# Supplementary material for: Quantitative Determination of Fluoride Mass Concentration in Beers Produced in Croatia Using the Standard Addition Method in Potentiometry
Source: MDPI journal article supplement (doi:10.3390/chemistry5040167), 2023-11-14
Supplement: s1 [file s1]

## Supplementary materials

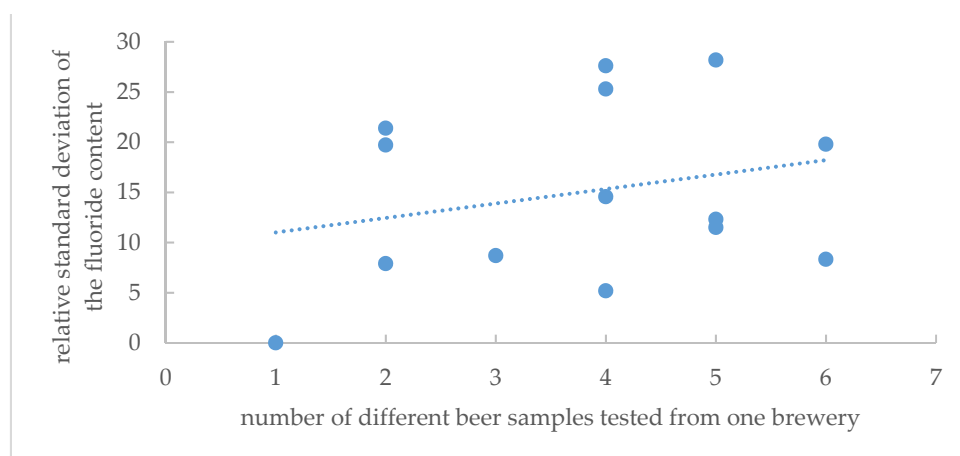

**Figure S1.** Scatter plot of the relationship between the number of different beer samples tested from one brewery and the relative standard deviation of the fluoride content in beers (from that brewery).
