# Supplementary material for: Quantitative Determination of Fluoride Mass Concentration in Beers Produced in Croatia Using the Standard Addition Method in Potentiometry
Source: MDPI journal article supplement (doi:10.3390/chemistry5040167), 2023-11-14
Supplement: s1 [file s1]

Archive with 1 entries (1 files):
- chemistry-2666938-supplementary.pdf
